# Supplementary material for: A high-performance organic electrochemical transistor based on foam-structured channels prepared using a template washing-off method
Source: Royal Society of Chemistry journal article supplement (doi:10.1039/d3tc01491f), 2023-01-01
Supplement: d3tc01491f1.pdf [file d3tc01491f1.pdf]

## Supporting Information

### High-performance organic electrochemical transistor based on foam-structured channel prepared with a template washing-off method

Shunhao He,<sup>1,2#</sup> Shanglin Xiang,<sup>1#</sup> Junjie Wang,<sup>2</sup> Kaili Wang,<sup>2</sup> Liuyingzi Yu,<sup>2</sup> Yaxin Song,<sup>2</sup> Chengcheng Zhu,<sup>2</sup> Zhongyan Gong,<sup>2</sup> Yulong Zhang,<sup>2</sup> Kun Gao,<sup>2</sup> Xing Kang,<sup>2</sup>  
Tingwei Wang,<sup>1\*</sup> Hai-Dong Yu,<sup>2,3\*</sup> Gang Lu<sup>2\*</sup>

<sup>1</sup>College of Materials Science and Engineering, Nanjing Tech University, 30 South Puzhu Road, Nanjing 211816, PR China

<sup>2</sup>School of Flexible Electronics (Future Technologies) and Institute of Advanced Materials, Nanjing Tech University, 30 South Puzhu Road, Nanjing 211816, PR China

<sup>3</sup>Frontiers Science Center for Flexible Electronics, Xi'an Institute of Flexible Electronics, and Xi'an Institute of Biomedical Materials & Engineering, Northwestern Polytechnical University, 127 West Youyi Road, Xi'an 710072, PR China

<sup>#</sup>These two authors contribute equally to this work.

\*Corresponding authors: Tingwei Wang, [wangtw@njtech.edu.cn](mailto:wangtw@njtech.edu.cn); Hai-Dong Yu, [iamhdyu@nwpu.edu.cn](mailto:iamhdyu@nwpu.edu.cn); Gang Lu, [iamglv@njtech.edu.cn](mailto:iamglv@njtech.edu.cn)

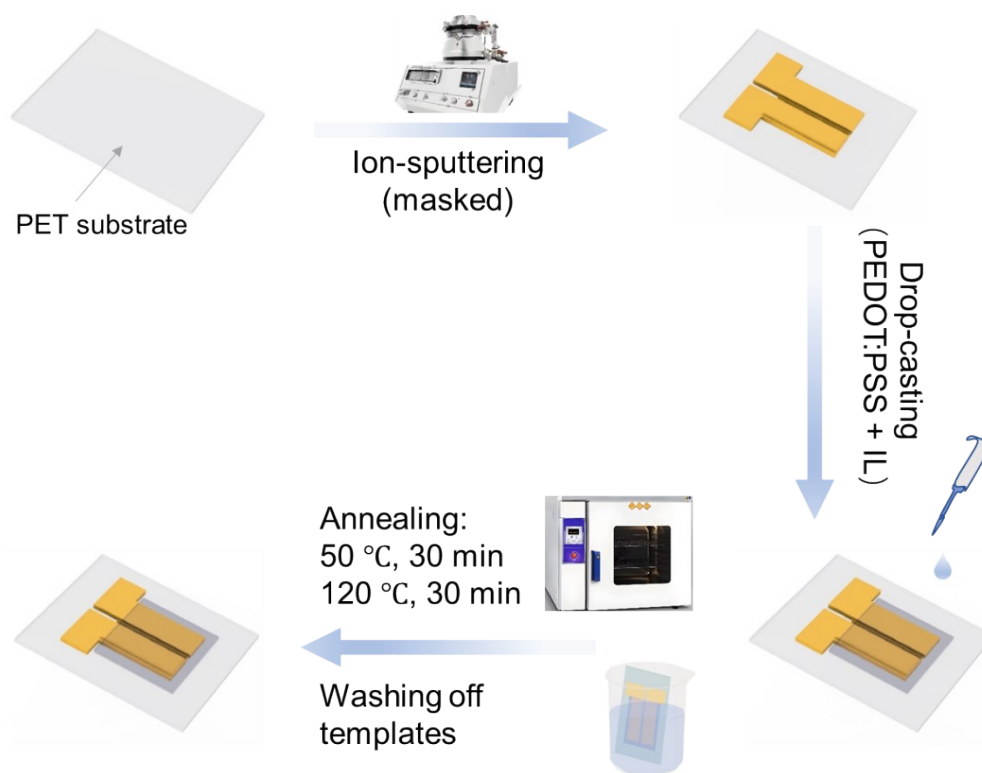

**Figure S1.** Preparation process of the OECT based on foam-structured PEDOT:PSS film. The source and drain gold electrodes were prepared by ion sputtering (masked). A mixture of PEDOT:PSS and IL in water:ethanol mixture was drop-casted and then annealed at 50°C for 30 min and followed by annealing at 120°C for 30 min. The IL in substrates was then washed away with a mixture of water and ethanol (volume ratio 1:3).

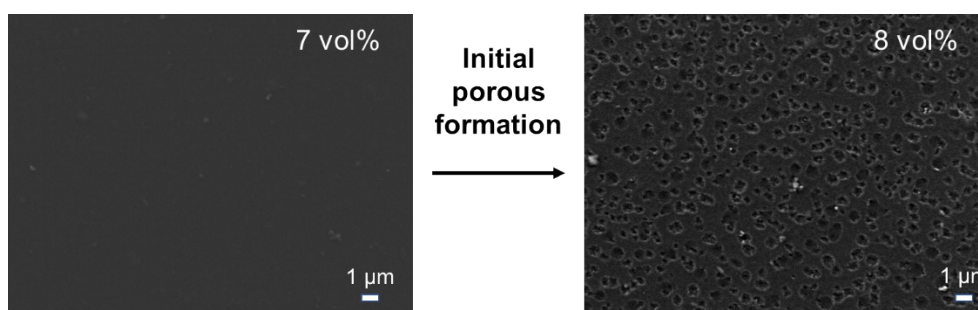

**Figure S2.** The porous structure foamed when the template ratio increased to 8 vol%.

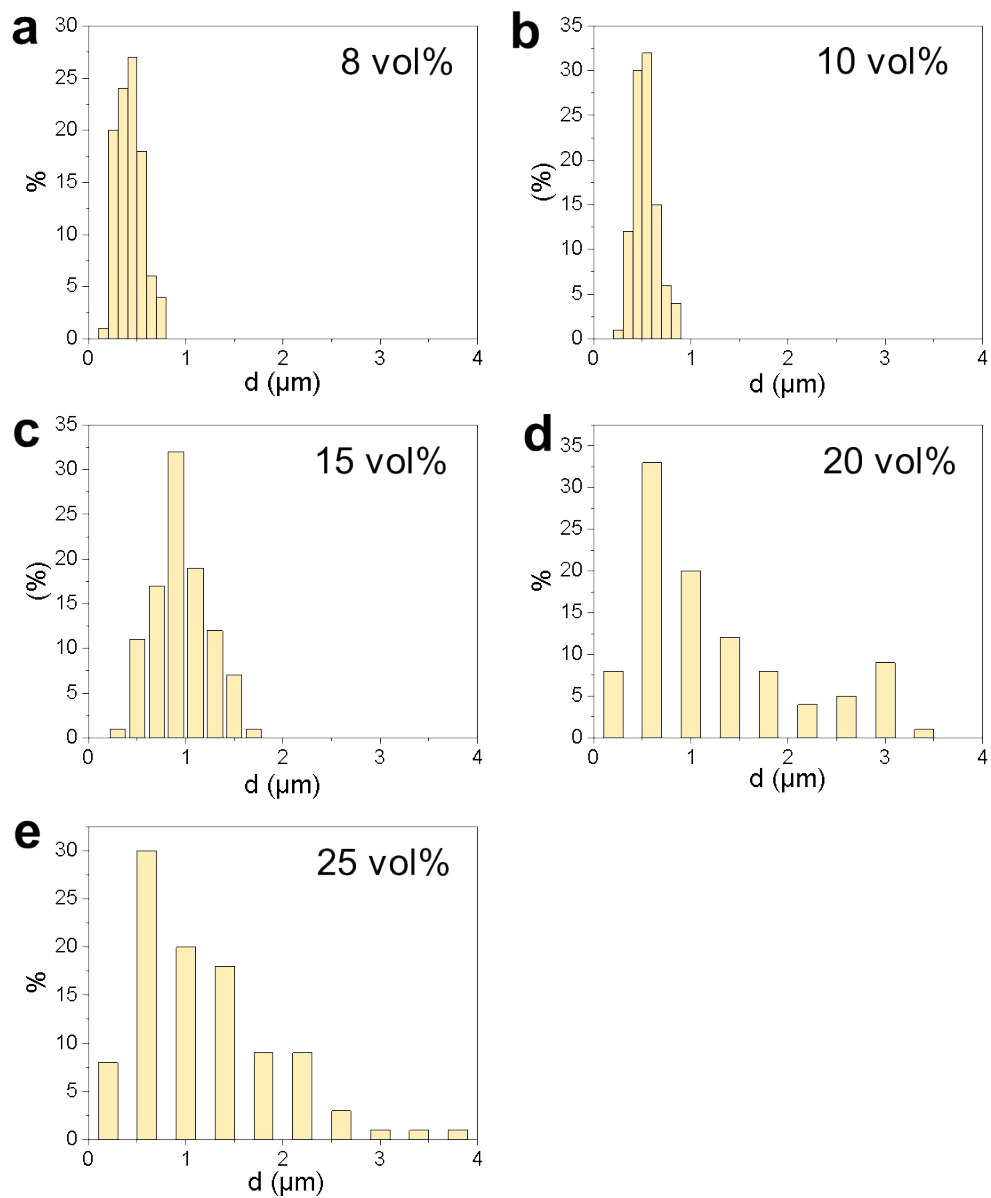

**Figure S3.** The distribution of pore diameters in the film samples with different pore contents. Roughly 100 pores were used for statistical analysis.

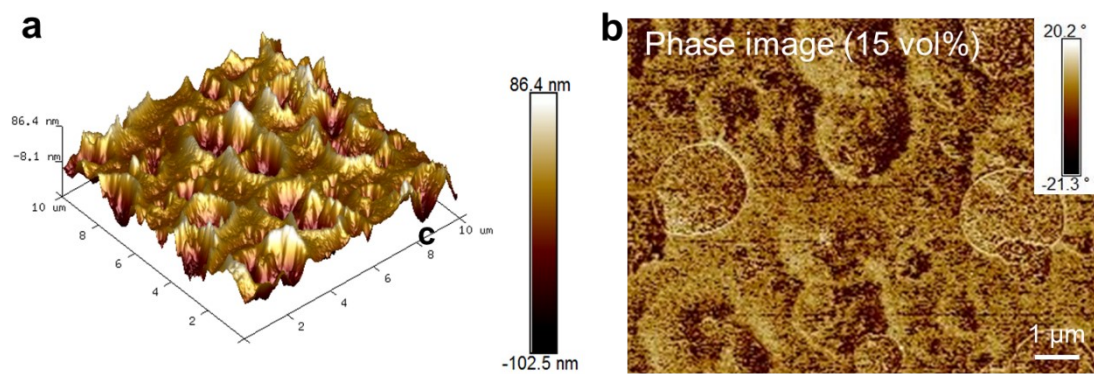

**Figure S4.** AFM (a) 3D topographical and (b) phase images of the foam-structured film with a pore content of 15 vol% foam films.

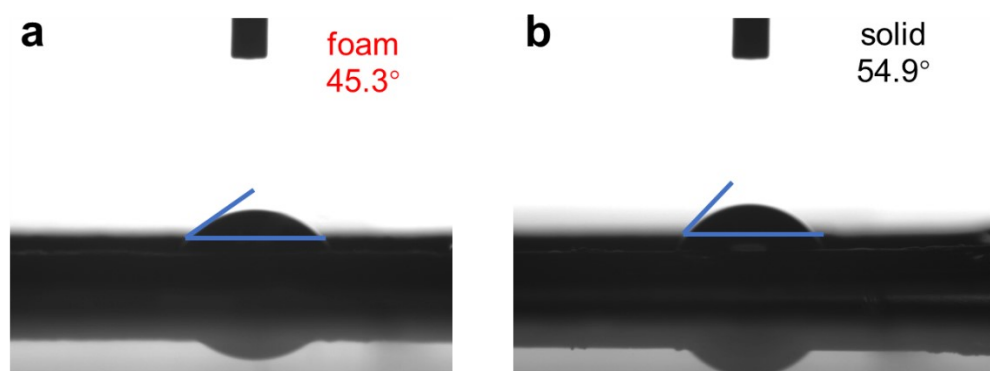

**Figure S5.** The water contact angles of the (a) foam-structured and (b) solid PEDOT:PSS films.

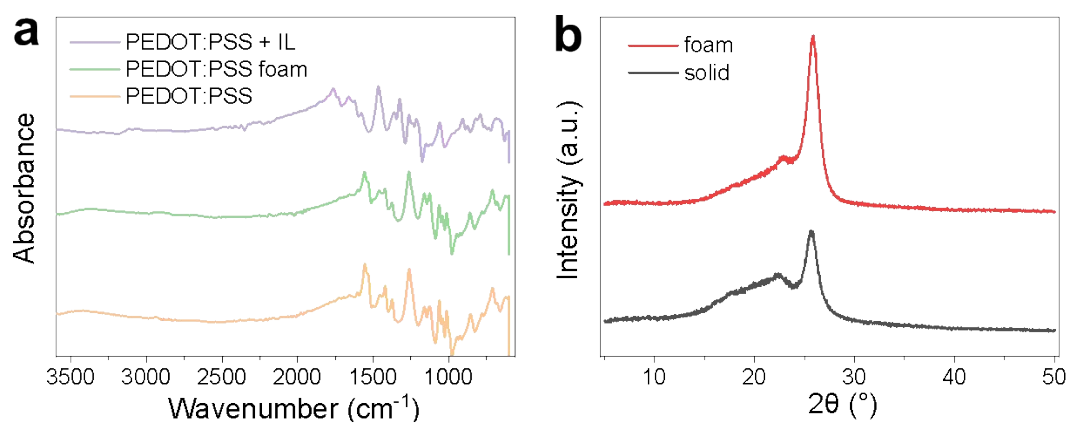

**Figure S6.** The (a) FTIR spectra and (b) XRD patterns of the foam-structured and solid PEDOT:PSS films. The peak of 1700~2000  $\text{cm}^{-1}$  indicates that IL was completely washed away.

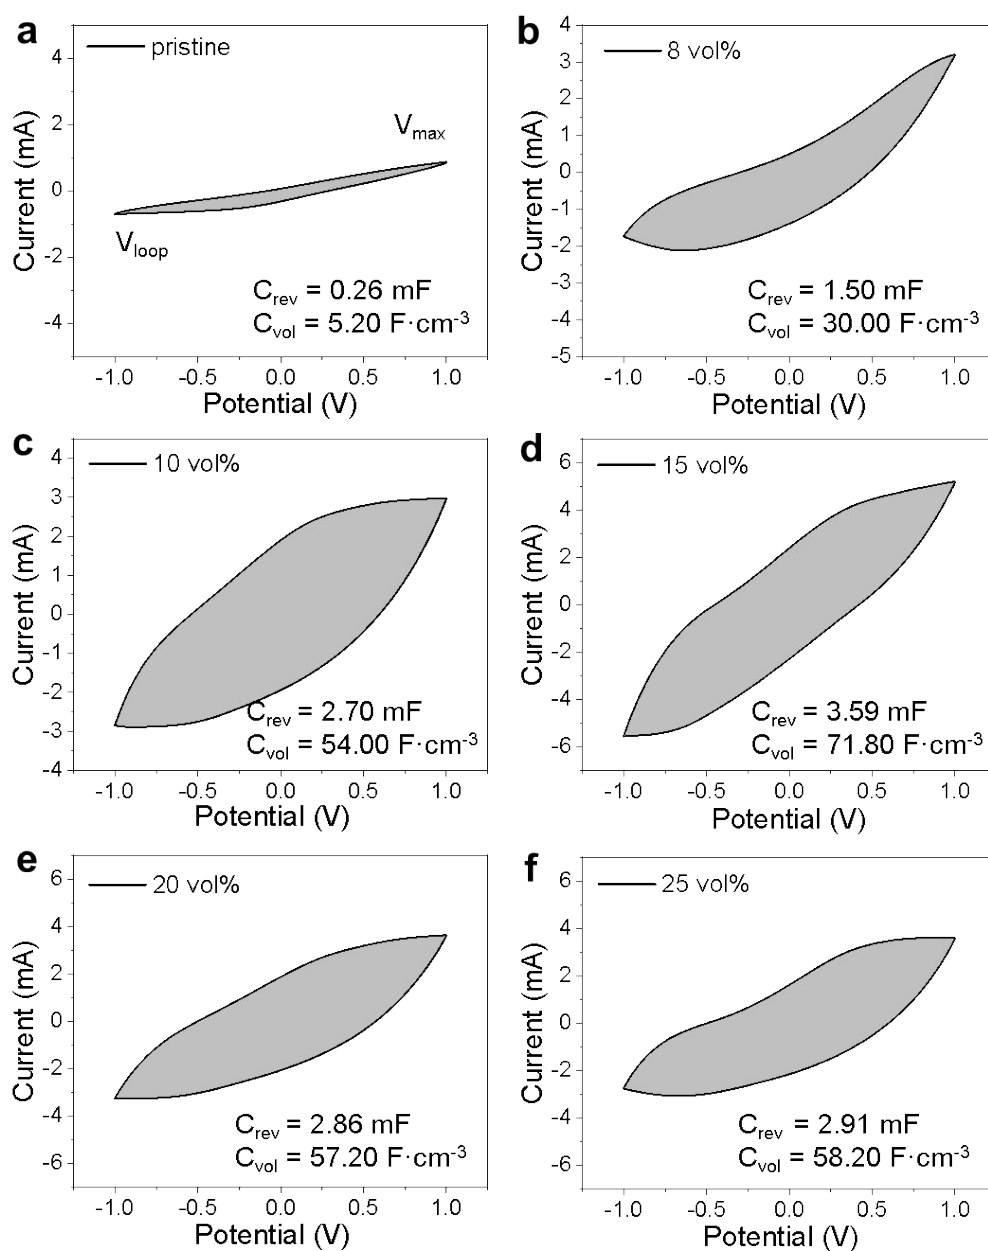

**Figure S7.** CV curves at different pore contents and their reversible charge storage capacities. PBS buffer (0.01 M) was used as the electrolyte during measurements.

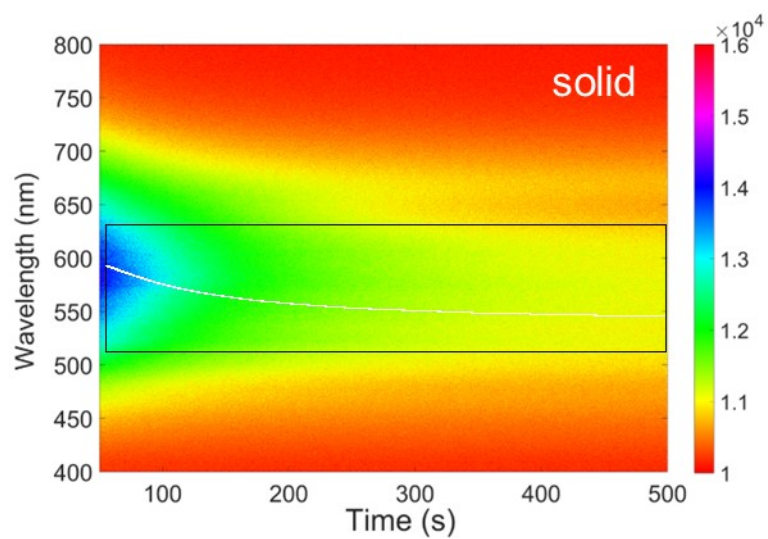

**Figure S8.** Kinetic absorption mapping of solid PEDOT:PSS film. A bias of 1.0 V was applied after 50 s.

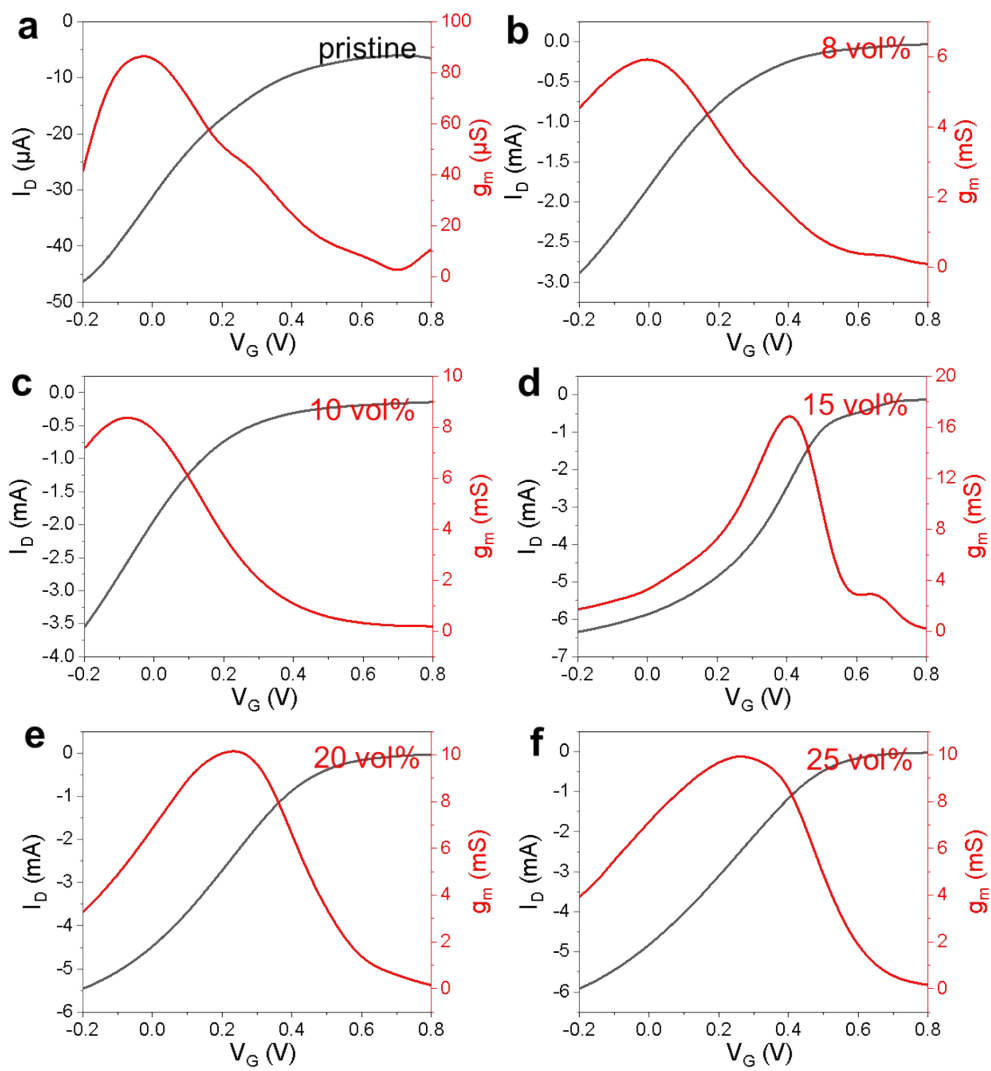

**Figure S9.** Transfer curves of the OECTs based on (a) pristine and (b-f) foam-structured PEDOT:PSS films. The pore content varied from 8 to 25 vol%. The drain voltage was set as 300 mV.
